# Supplementary material for: BRSK2 in pancreatic β cells promotes hyperinsulinemia-coupled insulin resistance and its genetic variants are associated with human type 2 diabetes
Source: PubMed Central journal article supplement (PMC10782904; doi:10.1093/jmcb/mjad033), 2023-05-15
Supplement: mjad033_supplemental_file.pdf [file mjad033_supplemental_file.pdf]

## Supplementary material

### **BRSK2 in pancreatic $\beta$ cells promotes hyperinsulinemia-coupled insulin resistance and its genetic variants are associated with human type 2 diabetes**

**Running title:**  $\beta$ -cell BRSK2 leads to T2DM

Rufeng Xu<sup>1</sup>, Kaiyuan Wang<sup>1</sup>, Zhengjian Yao<sup>1</sup>, Yan Zhang<sup>1</sup>, Li Jin<sup>2,6</sup>, Jing Pang<sup>1</sup>,  
Yuncaï Zhou<sup>1</sup>, Kai Wang<sup>1</sup>, Dechen Liu<sup>1</sup>, Yaqin Zhang<sup>1</sup>, Peng Sun<sup>1</sup>, Fuqiang Wang<sup>3</sup>,  
Xiaoai Chang<sup>1</sup>, Tengli Liu<sup>4</sup>, Shusen Wang<sup>4</sup>, Yalin Zhang<sup>5</sup>, Shuyong Lin<sup>5</sup>, Cheng Hu<sup>2,6,\*</sup>,  
Yunxia Zhu<sup>1,\*</sup>, and Xiao Han<sup>1,\*</sup>

<sup>1</sup> Key Laboratory of Human Functional Genomics of Jiangsu Province, Nanjing Medical University, Nanjing 211166, China

<sup>2</sup> Institute for Metabolic Disease, Fengxian Central Hospital Affiliated to Southern Medical University, Shanghai 201499, China

<sup>3</sup> Analysis Center, Nanjing Medical University, Nanjing 210029, China

<sup>4</sup> Organ Transplant Center, Tianjin First Central Hospital, Nankai University, Tianjin 300192, China

<sup>5</sup> State Key Laboratory for Cellular Stress Biology, School of Life Sciences, Xiamen University, Xiamen 361102, China

<sup>6</sup> Shanghai Diabetes Institute, Shanghai Key Laboratory of Diabetes Mellitus, Shanghai Clinical Center for Diabetes, Shanghai Sixth People's Hospital Affiliated to Shanghai Jiao Tong University School of Medicine, Shanghai 200233, China

\* Correspondence to: Xiao Han, E-mail: hanxiao@njmu.edu.cn; Yunxia Zhu, E-mail: zhuyx@njmu.edu.cn; Cheng Hu, E-mail: alfredhc@sjtu.edu.cn

## Supplementary Figures

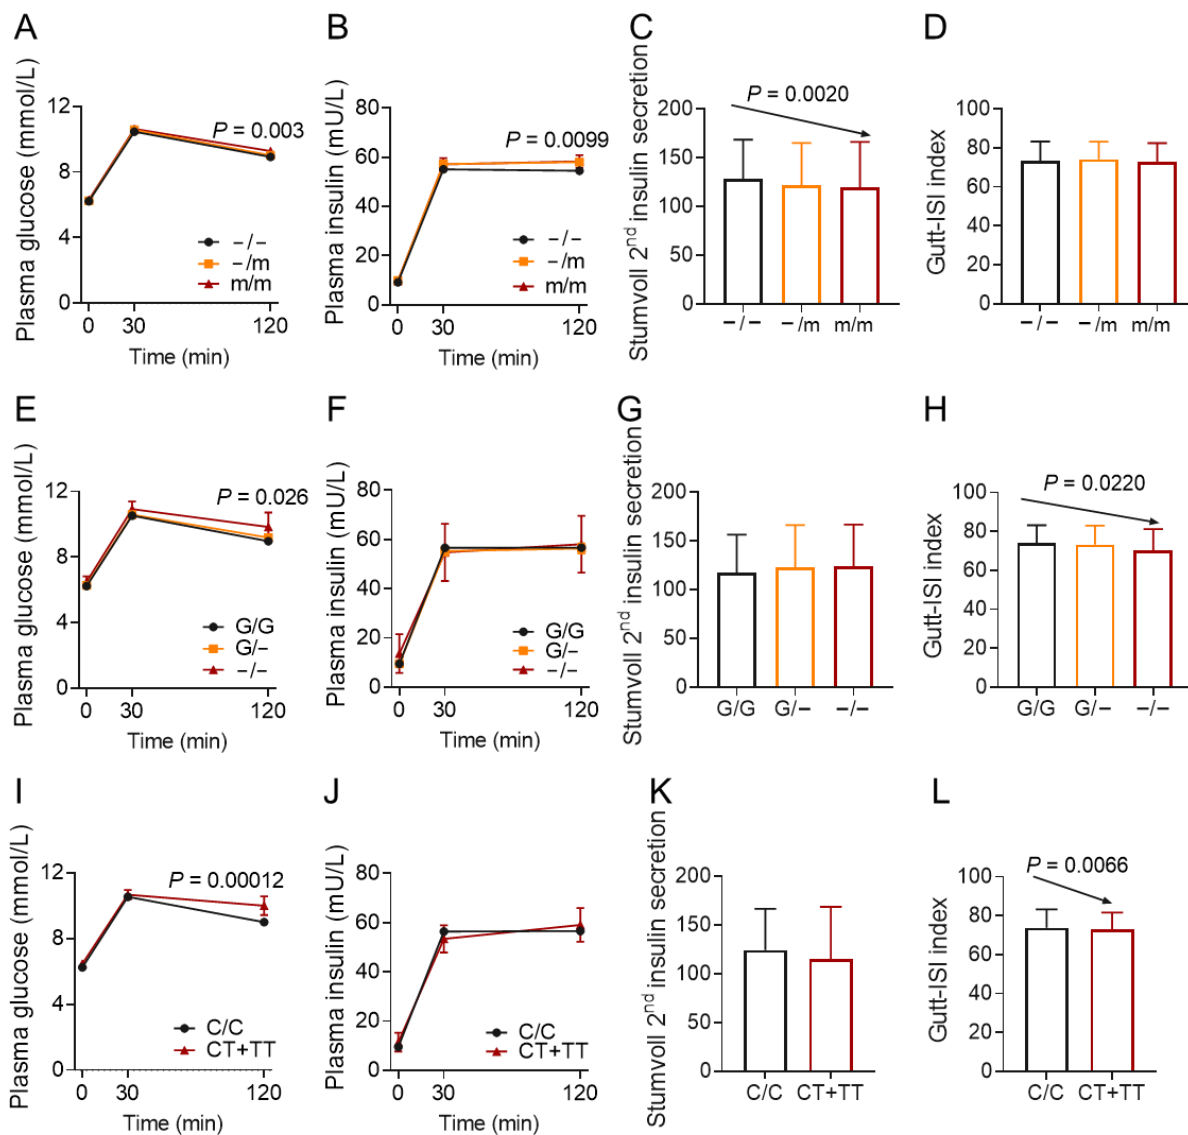

**Supplementary Figure S1. Association between BRSK2 and glucose metabolism in humans, related to Figure 1.** (A–L) Brsk2 loci genotyping of rs112377266 (A–D), rs61002819 (E–H), and rs536028004 (I–L). Each panel (from left to right) showed the plasma glucose level (A, E, I), insulin level (B, F, J), Stumvoll 2<sup>nd</sup> insulin secretion (C, G, K), and Gutt insulin sensitivity index (Gutt-ISI, D, H, L) after OGTT.

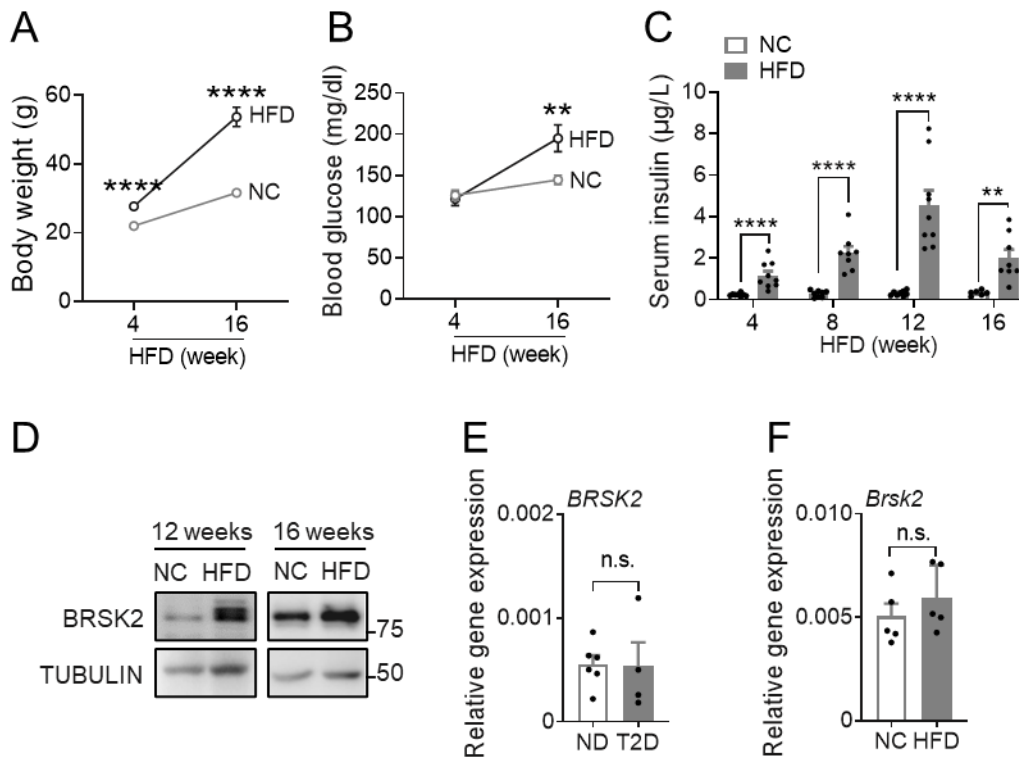

**Supplementary Figure S2. Elevated BRSK2 level in islet  $\beta$  cells is associated with obesity and hyperinsulinemia, related to Figure 2.** (A–C) Body weight (A), fasting blood glucose levels (B), and serum insulin levels (C) in wildtype C57BL/6J mice fed on NC or HFD for 4–16 weeks. (D) Western blot analysis of BRSK2 in primary mouse islets from mice fed on NC and HFD for 12 weeks or 16 weeks ( $n = 3$  mice per group). (E) qRT-PCR analysis of *BRSK2* gene expression in primary human islets from non-diabetic and T2-diabetic subjects ( $n = 6$  for ND,  $n = 4$  for T2D). (F) qRT-PCR analysis of *Brsk2* gene expression in primary islets from NC and HFD mice ( $n = 5$  per group). Data were presented by Mean  $\pm$  SEM. n.s. = not significant, \*\* $P < 0.01$ , \*\*\*\* $P < 0.0001$ .

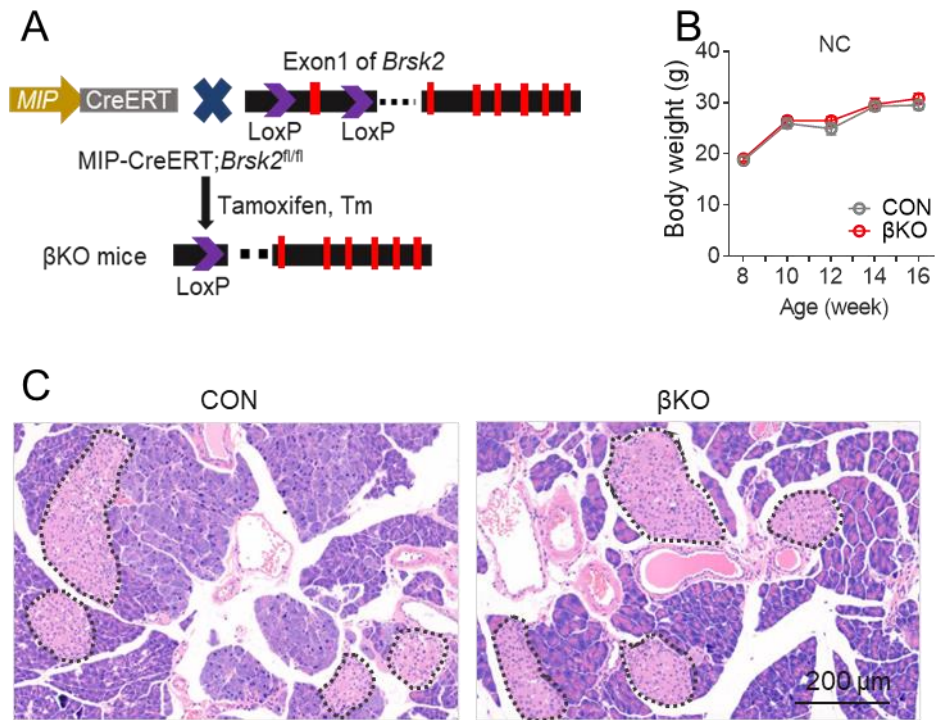

**Supplementary Figure S3. Deletion of BRSK2 in mature  $\beta$  cells has no effect on mouse growth, related to Figure 3.** (A) Schematic of  $\beta$ -cell-specific *Brsk2* knockout ( $\beta$ KO) mice. Cre-negative mice with tamoxifen (Tm) injection were served as control (CON) group. (B) Body weights of  $\beta$ KO and CON mice under normal chow-diet (NC) condition. (C) Representative H&E images of pancreatic slices showing islet area of CON and  $\beta$ KO mice at 3-month age fed on NC. Data were presented by Mean  $\pm$  SEM. n = 4–8 per group.

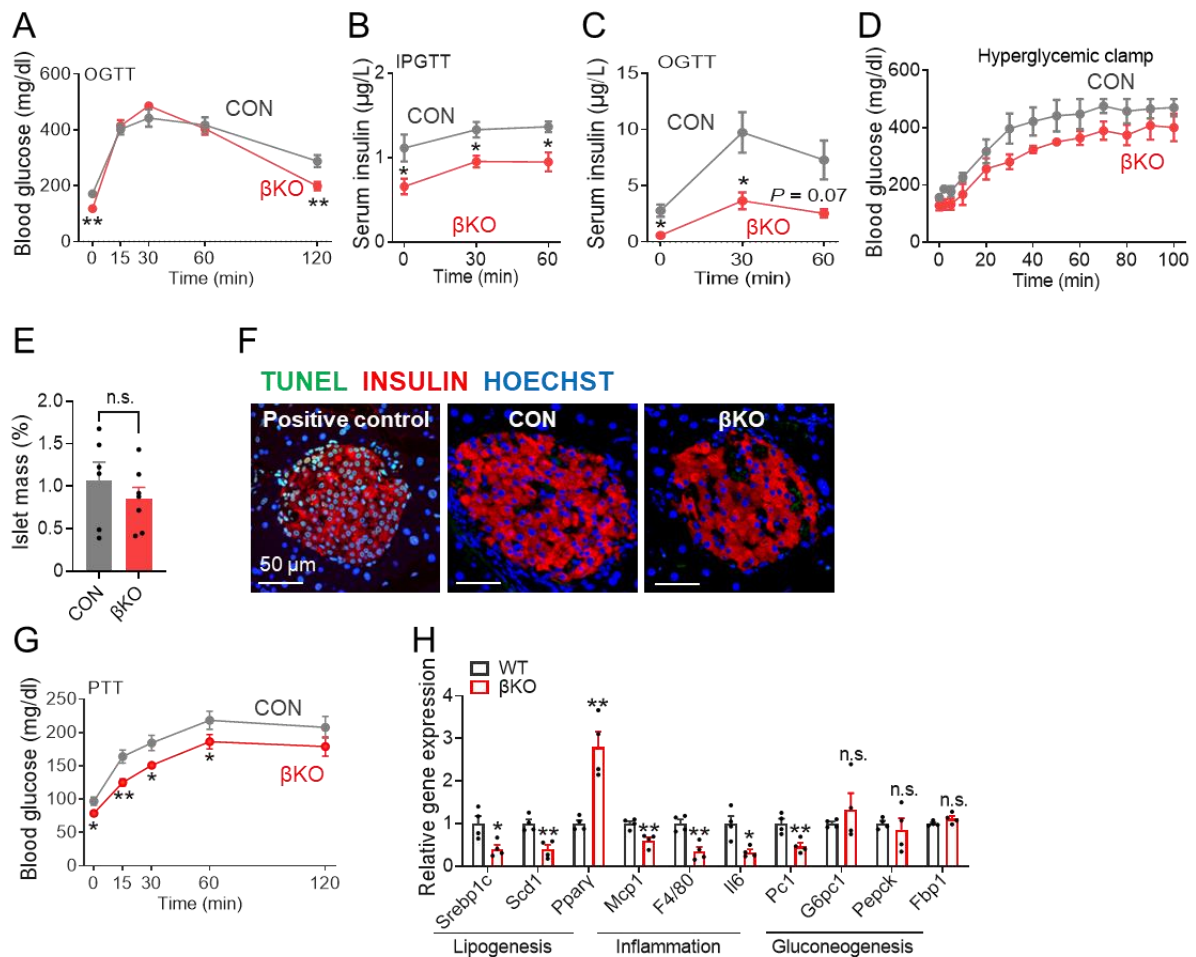

**Supplementary Figure S4. βKO improves HFD-induced metabolic abnormalities in mice, related to Figure 4.** (A–C) Blood glucose levels during OGTTs (A) and serum insulin levels during IPGTTs (B) and OGTTs (C) in CON and βKO mice with HFD feeding for 14 weeks. (D) Blood glucose levels during hyperglycemic clamps in CON and βKO mice with HFD feeding for 14 weeks. (E) Islet mass in CON and βKO mice with HFD feeding for 14 weeks. (F) Representative images of TUNEL (green) and INSULIN (red) staining in CON and βKO mice with HFD feeding for 14 weeks. Nuclei (blue). (G) Levels of blood glucose during pyruvate tolerance tests (PTTs) in CON and βKO mice with HFD feeding for 12 weeks. (H) Relative gene expression levels in the livers from CON and βKO mice with HFD feeding for 14 weeks. Data were presented by Mean ± SEM. n = 4–8 per group. n.s. = not significant, \* $P < 0.05$ , \*\* $P < 0.01$ .

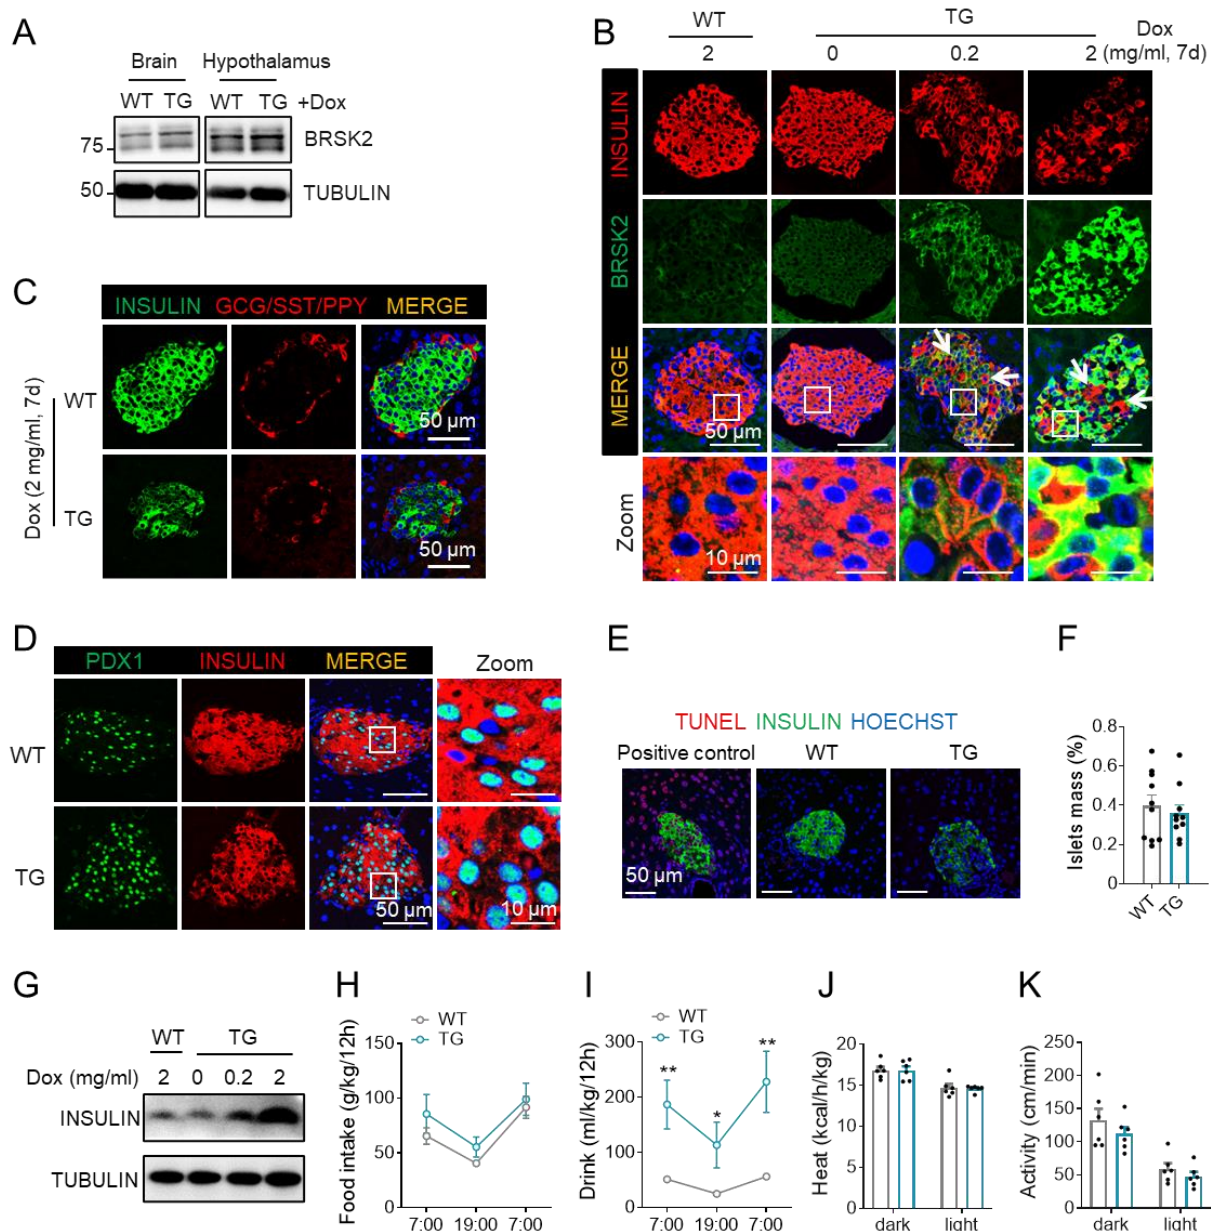

**Supplementary Figure S5. Gain-of-function of BRSK2 in  $\beta$  cells reduces cellular INSULIN amount in a BRSK2-dose dependent manner, related to Figure 5. (A)** Western blot analysis of BRSK2 protein levels in brain and hypothalamus from WT and TG mice with Dox induction for 7 days. TUBULIN was used as an internal standard. **(B)** Representative images of BRSK2 (green) and INSULIN (red) in pancreas slices from WT and TG mice with indicated concentrations of Dox induction for 4 days. **(C)** Representative images of INSULIN (green) and glucagon+somatostatin+pancreatic polypeptide (GCG/SST/PPY, red) in pancreas obtained from WT and TG mice with Dox induction for 7 days. **(D)** Representative images of PDX1 (green) and INSULIN (red) in pancreas obtained from WT and TG mice with Dox induction for 7 days. **(E)** Representative images of TUNEL (green) and INSULIN (red) in pancreas obtained from WT and TG mice with Dox induction for 30 days. **(F)** Islet mass in WT and TG mice with Dox induction for 30 days. **(G)** Western blot analysis of INSULIN protein levels in islets from WT and TG mice with Dox induction for 4 days. TUBULIN was used as an internal standard. **(H–K)** Metabolic cage showing day–night food intake **(H)**, drinking water **(I)**, heat **(J)**, and activities **(K)** of WT and TG mice with Dox induction for 4 weeks. Data were presented by Mean  $\pm$  SEM.  $n = 5–10$  per group. **\*\* $P < 0.01$ .**

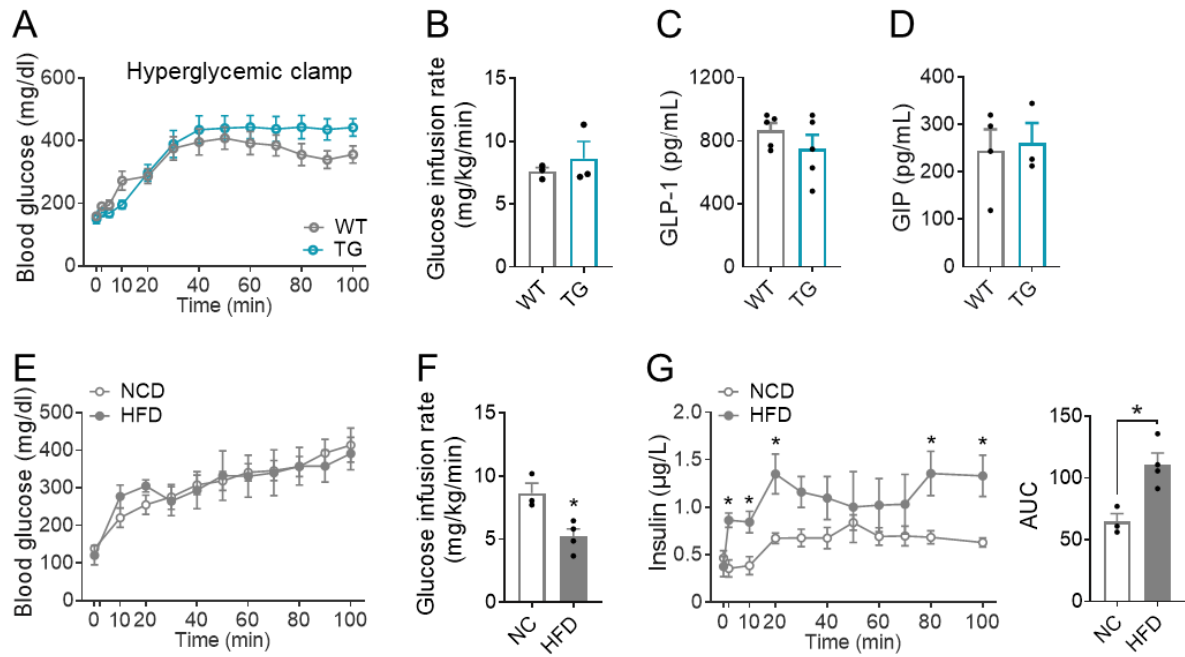

**Supplementary Figure S6. Hyperglycemic clamps in TG mice and HFD-fed mice, related to Figure 6.** (A and B) Blood glucose levels (A) and glucose infusion rate (B) during hyperglycemic clamps in WT and TG mice with Dox induction for 4 days. (C and D) Serum levels of GLP-1 (C) and GIP (D) of WT and TG mice with Dox induction for 7 days. (E–G) Blood glucose levels (E), glucose infusion rate (F), and serum insulin levels (G, quantitated AUC on the right) during hyperglycemic clamps in NC and 4-week–HFD-fed mice. Data were presented by Mean  $\pm$  SEM.  $n = 3–5$  per group.  $*P < 0.05$ .

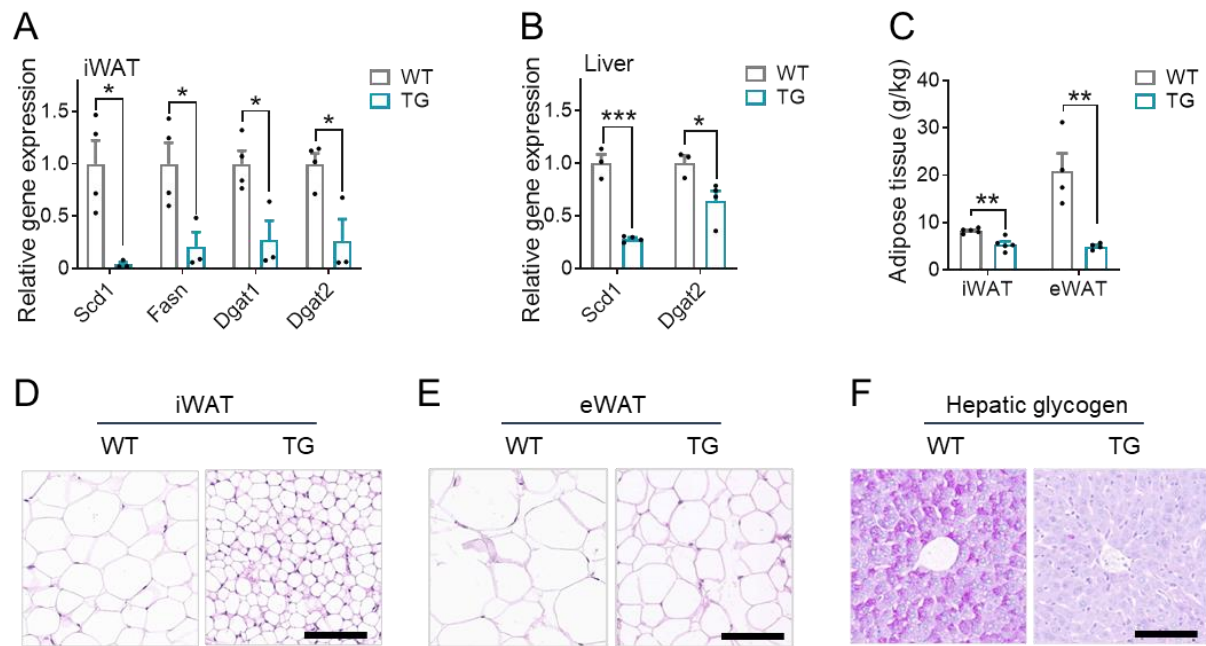

**Supplementary Figure S7. Gene expressions and morphological alterations in TG mice, related to Figure 7.** (A and B) qRT-PCR analysis of lipogenesis genes in iWAT (A) and liver tissues (B) from WT and TG mice with Dox induction for 2 weeks. *Actb* was used as an internal control. (C) Weights of adipose tissues relative to body weights in WT and TG mice with Dox induction for 2 weeks. (D and E) Representative H&E images of iWAT (D) and eWAT (E) showing adipocyte size in WT and TG mice with Dox induction for 2 weeks. Bar = 100  $\mu$ m. (F) Periodic acid–Schiff (PAS) staining showed the glycogen levels in the livers of WT and TG mice with Dox induction for 2 weeks. Bar = 100  $\mu$ m. Data were presented by Mean  $\pm$  SEM. n = 4 per group. n.s. = not significant, \*\* $P$  < 0.01, \*\*\* $P$  < 0.001, \*\*\*\* $P$  < 0.0001.



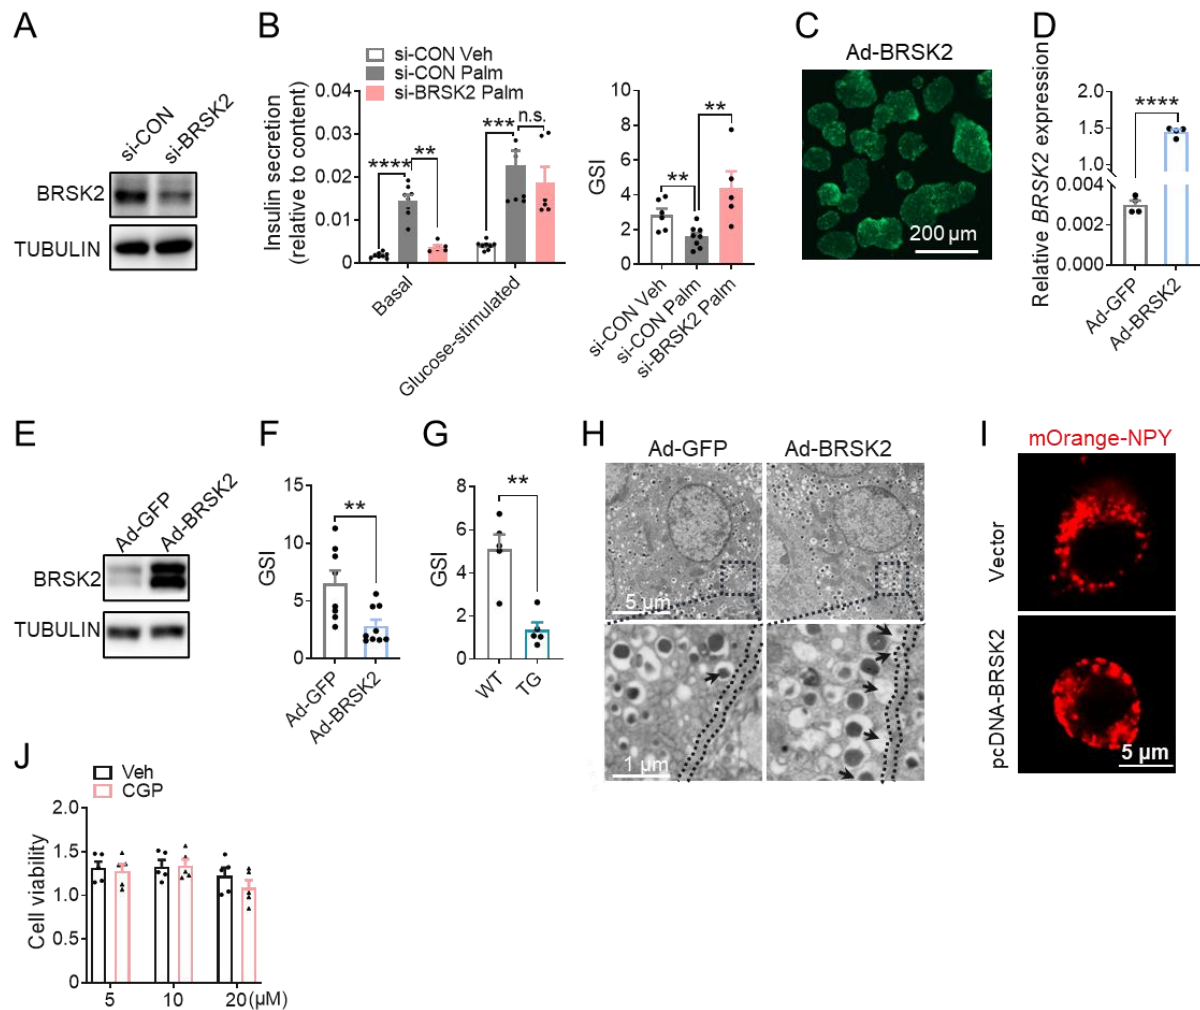

**Supplementary Figure S8. BRSK2 enhances basal insulin secretion, related to Figure 8. (A and B)** Primary mouse islets were transfected with si-BRSK2 and si-CON for 48 h. **(A)** Western blot analysis of BRSK2 levels to show interference efficiency. **(B)** GSIS function was showed as relative to insulin content, with quantitated GSI on the right. Basal = 3.3 mmol/L; Glucose-stimulated = 16.7 mmol/L glucose. **(C)** Representative images of human islets infected with Ad-BRSK2 for 24 h. **(D)** qRT-PCR analysis of *BRSK2* level in human islets infected with Ad-GFP or Ad-BRSK2 for 24 h. *ACTB* was used as an internal control. **(E)** Western blot analysis of BRSK2 protein levels in mouse islets infected with Ad-GFP or Ad-BRSK2 for 24 h. TUBULIN was used as an internal standard. **(F)** GSI quantitation of human islets infected with Ad-BRSK2 for 24 h. **(G)** GSI quantitation of islets isolated from WT and TG mice with Dox induction for 7 days. **(H)** Transmission electron microscopy (TEM) showed membrane-fused insulin granules in mouse islets infected with Ad-GFP or Ad-BRSK2 for 24 h. **(I)** Representative images of mOrange-NPY in MIN6 cells co-transfected with pcDNA-BRSK2 for 24 h. **(J)** MIN6 cells were treated with indicated doses of CGP 57380 for 48 h and CCK8 assays were performed to detect cell viabilities. Data were presented by Mean  $\pm$  SEM. n = 4 per group. n.s. = not significant, \* $P < 0.05$ , \*\* $P < 0.01$ , \*\*\* $P < 0.001$ .

## Supplementary Tables

**Supplementary Table S1. Clinical characteristics.**

|                                   | <b>Control</b>        | <b>T2DM</b>          |
|-----------------------------------|-----------------------|----------------------|
| N                                 | 4223                  | 2447                 |
| Age (year)                        | 55.71±7.11            | 58.54±6.91           |
| Gender (male%)                    | 0.41                  | 0.41                 |
| BMI (kg/m <sup>2</sup> )          | 24.25±3.02            | 26.03±3.32           |
| Body fat (kg)                     | 29.2(22.5,35)         | 32.2(25.4,38.3)      |
| WC (cm)                           | 82(76,88)             | 88(82,94)            |
| WHR                               | 0.88(0.84,0.92)       | 0.92(0.88,0.96)      |
| SBP (mmHg)                        | 130(120,140)          | 138(128,150)         |
| DBP (mmHg)                        | 82(78,90)             | 84(80,90)            |
| Uric acid (μmol/L)                | 284(238,336)          | 298(251,355)         |
| Total cholesterol (mmol/L)        | 4.95(4.39,5.59)       | 5.24(4.62,5.91)      |
| Triglyceride (mmol/L)             | 1.17(0.84,1.69)       | 1.65(1.15,2.45)      |
| Low-density lipoprotein (mmol/L)  | 2.98(2.5,3.48)        | 3.17(2.66,3.73)      |
| High-density lipoprotein (mmol/L) | 1.29(1.08,1.53)       | 1.21(1.03,1.42)      |
| Free fatty acid (μmol/L)          | 453(342,582)          | 659.5(504,838)       |
| HbA1c (%)                         | 5.5(5.2,5.7)          | 6.5(5.9,7.4)         |
| Fasting plasma glucose (mmol/L)   | 5.51(5.23,5.76)       | 7.41(6.63,8.79)      |
| PG30 (mmol/L)                     | 9.21(8.22,10.2)       | 12.26(10.74,14.12)   |
| PG2H (mmol/L)                     | 6.36(5.53,7.05)       | 14.16(11.91,17.61)   |
| Fasting plasma insulin (mU/L)     | 6.23(4.48,8.67)       | 9.15(6.1,13.71)      |
| IN30 (mU/L)                       | 52.44(36.13,77.27)    | 26.61(15.23,45.33)   |
| D30                               | 12.83(8.18,20.7)      | 3.53(1.81,6.28)      |
| IN2H (mU/L)                       | 32.37(20.51,48.21)    | 51.12(30.67,84.97)   |
| G <sub>AUC</sub>                  | 15.33(14.07,16.51)    | 24.53(21.99,28.57)   |
| I <sub>AUC</sub>                  | 79.74(57.4,114.97)    | 69.58(42.48,111.38)  |
| STU1                              | 459.1(336.75,586.29)  | 127.66(46.83,217.38) |
| STU2                              | 154.01(126.01,185.68) | 67.87(25.59,125.04)  |
| Gutt-ISI                          | 79.85(71.52,88.27)    | 50.34(38.62,62.42)   |

WC, waist circumference; WHR, waist-to-hip ratio; HbA1c, glycated hemoglobin A1c; SBP, systolic blood pressure; DBP, diastolic blood pressure; PG30, 30 min plasma glucose, PG2H, 2 h plasma glucose, IN30, 30 min plasma insulin, IN2H, 2 h plasma insulin, G<sub>AUC</sub>, area under the curve of the glucose from 0 to 120 min; I<sub>AUC</sub>, area under the curve of the insulin from 0 to 120 min; D30, change of insulin levels/change of glucose levels from 0 to 30 min; STU1, Stumvoll first phase insulin secretion; STU2, Stumvoll second phase insulin secretion. Data are presented as mean±SD, median(interquartile range), or N (%).

**Supplementary Table S2. Linkage disequilibrium of three SNPs.**

|             |       | <b>rs112377266</b> | <b>rs61002819</b> | <b>rs536028004</b> |
|-------------|-------|--------------------|-------------------|--------------------|
| rs112377266 | $r^2$ | 1                  | 0.001             | 0.011              |
|             | D'    | 1                  | 0.054             | 0.733              |
| rs61002819  | $r^2$ | 0.001              | 1                 | 0.1                |
|             | D'    | 0.054              | 1                 | 0.995              |
| rs536028004 | $r^2$ | 0.011              | 0.1               | 1                  |
|             | D'    | 0.733              | 0.995             | 1                  |

The pairwise linkage disequilibrium data of three SNPs are demonstrated. D' and  $r^2$  values calculated based on our genotype data.

**Supplementary Table S3. Antibodies of immunoblots and immunostainings.**

| <b>Antibodies</b>                                       | <b>Source</b>           | <b>Identifier</b>               |
|---------------------------------------------------------|-------------------------|---------------------------------|
| Rabbit monoclonal anti-BRSK2                            | Cell Signaling          | Cat#5460; RRID:AB_10838403      |
| Rabbit polyclonal anti-PDX1                             | Cell Signaling          | Cat#5679; RRID:AB_10706174      |
| Rabbit polyclonal anti-MAFA                             | Santa Cruz              | Cat#sc-66958; RRID:AB_2234386   |
| GAPDH (1A6) monoclonal antibody-HRP                     | Bioworld                | Cat#MH001H; RRID:AB_2857326     |
| Mouse monoclonal anti- $\alpha$ -tubulin                | Sigma-Aldrich           | Cat#T4026; RRID:AB_477577       |
| Rabbit polyclonal anti- $\beta$ -actin                  | Bioworld                | Cat#AP0731; RRID:AB_2797410     |
| Mouse monoclonal anti-insulin                           | Servicebio              | Cat#GB13121; RRID:AB_2811186    |
| Goat polyclonal anti-insulin                            | Santa Cruz              | Cat#sc-7839; RRID:AB_2800506    |
| Rabbit polyclonal anti-glucagon                         | Servicebio              | Cat#GB11097; RRID:AB_2811187    |
| Rat monoclonal anti-somatostatin                        | Abcam                   | Cat#ab30788; RRID:AB_778010     |
| Rabbit polyclonal anti-pancreatic polypeptide           | Phoenix Pharmaceuticals | Cat#H-054-02; RRID:N/A          |
| Mouse monoclonal Syntaxin 1A (STX1A)                    | Proteintech             | Cat#66437-1-Ig; RRID:AB_2881807 |
| Rabbit polyclonal SNAP25                                | Proteintech             | Cat#14903-1-AP; RRID:AB_2192051 |
| Rabbit polyclonal VAMP2                                 | Proteintech             | Cat#10135-1-AP; RRID:AB_2256918 |
| Rabbit anti-phospho-AMPK substrate motif [LXRXX(pS/pT)] | Cell Signaling          | Cat#5759; RRID: AB_10949320     |
| Rabbit monoclonal anti-phospho-Akt (Thr308)             | Cell Signaling          | Cat#13038; RRID: AB_2629447     |
| Rabbit monoclonal anti-phospho-Akt (Ser473)             | Cell Signaling          | Cat#4060; RRID: AB_2315049      |
| Anti-mouse IgG                                          | Cell Signaling          | Cat#7076; RRID: AB_330924       |
| Anti-rabbit IgG                                         | Cell Signaling          | Cat#7074; RRID: AB_2099233      |
| Donkey anti-rabbit 488                                  | Proteintech             | Cat#A21206; RRID: AB_2535792    |
| Donkey anti-Mouse 594                                   | Invitrogen              | Cat#A32744; RRID: AB_2762826    |
| Donkey anti-Goat 488                                    | Yeasen Biotech          | Cat#34306ES60; RRID: N/A        |
| Donkey anti-Rat 594                                     | Yeasen Biotech          | Cat#34412ES60; RRID: N/A        |

**Supplementary Table S4. Primer sequences of qRT-PCR.**

| <b>Gene symbol</b>          | <b>Forward (5'~3')</b> | <b>Reverse (5'~3')</b>  | <b>PCR product (bp)</b> |
|-----------------------------|------------------------|-------------------------|-------------------------|
| <b>qPCR primers (mouse)</b> |                        |                         |                         |
| <i>Actb</i>                 | GGCTGTATTCCCCTCCATCG   | CCAGTTGGTAACAATGCCATGT  | 154                     |
| <i>Arppp0</i>               | GAAACTGCTGCCTCACATCCG  | GCTGGCACAGTGACCTCACACG  | 147                     |
| <i>Brsk2</i>                | ACCTGCTGCTAGATGAGAGGA  | CTCGCCCCGAATCACTTCC     | 134                     |
| <i>Scd1</i>                 | TTCTTGCGATACTCTGGTGC   | CGGGATTGAATGTTCTTGTTCGT | 98                      |
| <i>Pparγ</i>                | TGCAGCCTCAGCCAAGTTGAA  | TTCCCGAACTTGACCAGCCA    | 77                      |
| <i>Mcp1</i>                 | CACTCACCTGCTGCTACTCA   | GCTTGGTGACAAAACTACAGC   | 117                     |
| <i>F4/80</i>                | TCATCAGCCATGTGGGTACAG  | CACAGCAGGAAGGTGGCTATG   | 70                      |
| <i>Il6</i>                  | TAGTCCTTCTACCCCAATTTCC | TTGGTCCTTAGCCACTCCTTC   | 76                      |
| <i>Fasn</i>                 | GGAGGTGGTGATAGCCGGTAT  | GGAGGTGGTGATAGCCGGTAT   | 140                     |
| <i>Dgat1</i>                | TCCGTCCAGGGTGGTAGTG    | TGAACAAAGAATCTTGCAGACGA | 199                     |
| <i>Dgat2</i>                | GCGCTACTTCCGAGACTACTT  | GGGCCTTATGCCAGGAAACT    | 172                     |
| <i>Srebp1c</i>              | TGACCCGGCTATTCCGTGA    | CTGGGCTGAGCAATACAGTTC   | 61                      |
| <i>Pepck</i>                | CTGCATAACGGTCTGGACTTC  | CAGCAACTGCCCGTACTCC     | 159                     |
| <i>Pc1</i>                  | TGGGTTCTCTCAGAGCGAG    | GTCTCCCATCTTGCGGACC     | 100                     |
| <i>G6pc1</i>                | CGACTCGCTATCTCCAAGTGA  | GTTGAACCAGTCTCCGACCA    | 173                     |
| <i>Fbp1</i>                 | AGTCGTCTACGCTACCTGTG   | GGGGATCGAAACAGACAACAT   | 102                     |
| <b>qPCR primers (human)</b> |                        |                         |                         |
| <i>ACTB</i>                 | CATGTACGTTGCTATCCAGGC  | CTCCTTAATGTCACGCACGAT   | 250                     |
| <i>BRSK2</i>                | ACATCCGCATCGCAGACTTT   | CGCAAGTTGTCATCGTCCAAG   | 205                     |
